# Supplementary material
Source: MDPI journal article supplement (https://www.mdpi.com/2073-4441/12/9/2650)
Supplement: s1 [file s1]

Water-867313 (Yokota and Mehrlrose)

Supplementary File 1

Product ingredient list of CS

Ingredients: Water, Sodium Laureth Sulfate, Acrylates Copolymer, Cocamidopropyl Betaine, Fragrance, Prunus Armeniaca (Apricot) Seed Powder, Titanium Dioxide, Glycol Distearate, Sodium Chloride, Laureth-4, DMDM Hydantoin, Sodium Hydroxide, Tetrasodium EDTA, Citric Acid, Hydrogenated Jojoba Oil, Cocos Nucifera (Coconut) Oil

Product ingredient list of DP

INGREDIENTS: WATER, SODIUM LAURETH SULFATE, COCAMIDOPROPYL BETAINE, ACRYLATES COPOLYMER, GLYCERIN, FRAGRANCE, POLYQUATERNIUM-7, PEG-7 GLYCERYL COCOATE, LIMONENE, POLYLACTIC ACID, SILICA, DMDM HYDANTOIN, TETRASODIUM EDTA, SODIUM HYDROXIDE, SODIUM CHLORIDE, ORANGE 4, RED 4
